# Supplementary material for: Molecular Evolution of MDM1, a “Duplication-Resistant” Gene in Vertebrates
Source: PubMed Central journal article supplement (PMC5033493; doi:10.1371/journal.pone.0163229), 2016-09-22
Supplement: pone.0163229.s003.pdf [file pone.0163229.s003.pdf]

```

          410      420      430      440      450      460      470      480      490      500
daphnia      -LAAENRAGAPPGSFSQQQ-----QEQQQHNRVQVVLVAGETTANKRT
silkworm     -AGRRSKSEGRPRQPRWDTVE-----PKATTALGEVVVAKEPDMVS----
butterfly   -AGRRSKSEGRPRQPRWDTVE-----PKATTALGEVLAAKEPETVS--
bee         -LPRRKKCP ELAYKTHEFITAADGGGIDAVD-----SNVVADKVRVTTQSGLPSPSLSK
fly        -PSRRSKSEGPVVPNGRA-----YPIATEIDGTTRKQAGESNGLLKK
mansoni     -TPKPIESDYPMVTRAPDATRQHKS-----KMPLQEYSENWKL EPPKAAV-YTC
viverrini   -GDSPVVTGSHKTPQAPRAVRKKGTLE-----YIVAPNIENKRRRKSYSPLAQPRL
sinensis    -KDSPVVP GSHKTPQAPRAVRKKGTLE-----YIVAPNIENKRRRRSSSPFAQPRL
anemone     -----PDDTPQSLVQEVROKAAI-----KDEDKIGSKALQYKAGLRPTNPPR
Trichoplax  -----PPSPIRAAKGPAITKTGKHVPKAGGDASKTK-----GKAEQETDEALQYRAGIKAR-P-G
Saccoglossus
cion        -KRKSIQEQSGPVSPTKSIKSPKSSP-----KKE TKS KNIPLRYR---SLN-SRL
telata      KKTRPVKPTSPPAKTKVVAIETKAP EEA KKLKESVNLSKMEAKKENDARRVYEVQLAKEEDLIRROVEKER EIEQKKKALKGN YAMKYRSGVAPP-RSR
Medaka      -KPHPFGRHSQPQPSSVPAAAAANELQP-----PPPAMKADHVTRRRAGSKAP-GHG
tilapia     -QHPPPEIIPDPPQSRKLPDHDLLLRN-----QLMENLIDYALRQKAGLRSG-GQR
stickleback -KPRPSKLD SRPQPSQPLTSAP-----DGRANEVQRALRWRVGLK--GQR
molly       -KLRPSEPGGPAEPE-----QQPGNQVDKAWGQR-----
platyfish   -KLRPFEPGGPAEPE-----QQPGNQVGKAWGQR-----
mouse       -KHQGVTRSHAPVSADVELRPSSKQPLS-----QSIDPRLDRHLRKKAGLAVV-PTN
human       -ENNEGVTNHTPV NENVELEHSTKVL S-----ENVDNGLDRLLRKKAGLTVV-PSY
cat         -NNEDVIEGHIPV NENELEHSTKLLS-----ENVDNGLNRVLRKKAGLTVV-PSH
cattle      -NKEDIKANDIPANENV ELKHSTKPLS-----ENVDDRLLNRL LQKAGLTVV-PSH
python     -GRSKKSVSQT PVHENKVLASTKKDL-----GKTDHGLNRVLRQRRAGMNIS-QSR
chick       -NSMKKTPPVAPPNQKEAFVSPKKEA-----EKVNGLHRVLRQKGGMNT-P-HLS
xenopus     -STVKKTAIEAPEDNRET VAPSKKVNS-----QAKANGVHRVLRKKAGLSTA-PLQ
shark       -AGDKPQVAEAEQKSKKD NNTPPKKEGAD-----EGIANGVSVVLQKKSGLKTA-PRK
gar         -KNLPSSDPDKHCPTRTAAAAERS-----DAGLDGVHRVMOKKAGLST-VRR
zebrafish   -TTAPSQPPQAEAAQTSTFAVQKQ-----KQALNGINHALRMKAGLRSE-HQR
tetra       -----LNYALRKKAGLRTA-RQR
cavefish    -QQE IARPGSPPASVHVTRTS-----
limpet      KSSSHHDTHHAHQONQERQNI PKTHKTKMAARKNPEEIRYKAGLKDKNIQDVL ENK KFPNKMNEFTQANIKKGILDSAPEATADYSLOQYKAGVA---PLR
oyster      EGGRK TAPSALRQSKEQYSKTIDNRME-----SAVKSWVKDKNVGSMNEFAQTNL DKG IADSAPEAPADYALRYKTGVSVPRPRR
aplysia     -DLKDVLDGQAPPPKEAGVKTRESDAQL-----EKGRGNMNEFVQTNMKGVALSGPEAPAEYALKYKAGVAPPRPVK
Clustal Consensus

```

```

          510      520      530      540      550      560      570      580      590      600
daphnia      ISTTGSSEYQLQFAW-----PPS--GV--KNISNTSSAFSN
silkworm     -----TEYRNQFAWPKD-----DT-----TPR-----KSISMGALKKAA
butterfly   -----TEYRNQFAWPKD-----EV-----VPR-----KSISMGALKKAA
bee         AISRISTEYRLQFAWPRR-----PQLTNGETVAPGVTAAGLPAGTTGPPR-----KSLSMGALKQGI
fly         TINKLSTEYRLQFVWPV-----RRIKGGGEATSRAAAGD-----YPR-----KSISLGALRS
mansoni     EKSRL-SEYQSAFKAPQF-----NYKLEPTKSTRPFTCKL-----DKF--QS--CKISYDTEYRHE
viverrini   -----TEYQRAYKAP E LTPIQRPRTAQSE--FPTTFKA-----SSH--HG--QIDIFETEYARE
sinensis    -----TEYQRAYKAP E LTVSPQRPKTAQSE--FQTAFKA-----RSY--HG--QIDSFETEYARE
anemone     KKQRYVSEYQKQFYWKPP-VGREAPILSAEKVV FSSQDNL-----PPA--KPVKISMPTKSEYQLQ
Trichoplax  LAYGK-SEYQROYDWWKL-PERASPIIAADNTIFKSSTDI-----APVKVDMG--PRPNVKSEYQRO

```







```

      810      820      830      840      850      860      870      880      890      900
daphnia  LRKKAGEYKRGGL-GGELMSDHMADLYAKQFDVWEQVSRSSLS-----ALALAATSPPRGSE-----
silkworm LRKKAGEYKRGW-GTELAPHEHLTQLYNKQIELWYQVSRSSLS--ALSLASTNHKVLPRDEKDGKESKNQSP-----
butterfly LRKKAGEYKRGW-GTELAPHEHITQLYNKQIELWYQVSRSSLS--ALSLASTNHKALPRDEKDGKESRNLS-----
bee      LRRLADEYKHRDW-GCGLAAE-----DEASLWKRVSNNHALN-----ALSLARSVTKEEKEKENTRKVPVTAAMTMPPAGRPSVQARPIHGILQD
fly      LRKKAGEYKCRGW-GIEIDPE---LYKKQKDLWDQVSKRSSLS--ALSLASSVHRPITKEEKEQENNKSTPLQKAQKPRVPGQAFLLDNKDEISALPA
masoni   LRKKADAYRKRDR-ESHFSREHLAQLLESDYVDHWDPPSDNYME-----NLEKYREVLQMPRAGKPTDL-----
viverrini IRNQADLYRKRDL-ESHFTRDHLAQLASAFVDYWDQPSDDRYAR-----NREKSLTTLAQPPACKPS-----
sinensis IRNQADSYRKRDL-ESHFTRDHLAQLASAFVGYWDQPSDDRYAR-----NREKFLKILAQPPACKPS-----
anemone  LRNKAQSYKTRAR-GDSQFLGILKSLLEEQQSITLEKANKRTPSA--QHRLRDDEANRVPDMRIECLERQKA-----
Trichoplax LREKVQLFRERSQQGTFTRKNLLVMEQAQEDLWEPASDTSRSG-----SSISTQTTGSEKKDE-----
urchin   LRERAKEYQKRSR-GTHFTRQHLGQLLANQAKLWEESSDQLSTS-----LTPSERVTVSTARPAAGKTYT-----
Saccoglossus LRKKAQYQKRAR-GTHFSREHLAQLLAQQVKMWESESVSTST-----LTPSERVTVSTARPAAGKTYT-----
ciona    IHQEANQNKQNRD-ANSFDPDHATQLHSPKNKFWEIMSATESNV-----DTVSNSTSSVKKVVESELKSKDV-----
telata   LRKKAQYRKRDL-ESHFTRDHLAQLYAQNAELWDSYSVVSALS-----DASPLAAGPSPDPGSHSGS-----
Medaka   LRQALMYRRRAW-GANFSRDHLGQLLSHQNALWEPSTTDSMA-----DASPLAAGPSPDPGSHSGS-----
tilapia  LRQKALLYRHRAW-GTNFSRDHLSQLVSEHNALWELDTTVSAN-----DPASPRLPPNPSPDRDSSHSTS-----
stickleback LRLKASSYRRRAW-GANFDRDHLSQLLSEHNALWEPDPTT-----DGPTPRPTFDLHADPDCGTS-----
molly    RRQQAQAYRRRAW-GTNFSRDHLSQLLSEHNALWEPADSHSDPS-----TPLPNRDLSPEDSRRAS-----
platyfish RRQQAQAYRRRAW-GTNFSRDHLSQLLSEHNALWEPDSDP-----TPPNRDLSPEDSRRAS-----
mouse    LREKAESYRKRQV-GTHFSRDHLNQLMSDNCCWDVSSVTSSEG-----TVSSNIRALDLAGDLTNHRT-----
human    LREKAEFYRKRQV-GTHFSRDHLNQLISDSNCCWDVSSVTSSEG-----TVSSNIRALDLAGDPTSHKTL-----
cat      LREKAEFYRKRQV-GTHFSRDHLNQLLSDNNCCWDVSSVTSSEG-----TISSNIRALDLAGDPTSHKTL-----
cattle   LREKAEFYRKRQV-GTHFSRDHLNQLISENNRCWDVSSVTSSEG-----TISSNIRALDLAGDPTSHKTL-----
python   LREKAAYRQRIQ-GTHFSRDHLNQLISDNRFWDLSSSESSVEE-----TMSNNVRLDLARVPEKNQSL-----
chick    LRARAKAYRQRIE-GTHFSRYHLNQLLSDNNSLWDVSSNSSEEE-----GISNDIRALDLAGVSEKETAP-----
xenopus  LREKADYYRREQ-GTHFSRNHLNQLISVNNKFWDVSSNSSEEE-----QVSHNIKALDLAGFQAHSKKE-----
shark    LREKAQYRKRAL-GTHFSRDHLSQLSEPNKLWELSSVTSSEE-----SVCDSVRALDLERARETPKIP-----
gar      LRERAEYKRW-KRAW-GTHFSREHLSQLSEQNRLWEVNSSSTVTE-----DTVSDTVNALDLARADVVRSP-----
zebrafish LRERAEYKRW-KRAW-GTHFSRQHLNQLISDQNMWEPSSGTSSSS-IESEACRSTSHIIEALDLARAGSVRESS-----
tetra    LRAKADAYRKRAL-GTHFSRQHLSQLVISEQNCLWEASSASSSSTLTEQDSSHSSPTIEALDLARVDSVRS-----
cavefish LRAKADAYRKRAL-GTHFSRQHLSQLVISEQNCLWEASSASSSSTLTEQDSSHSSPTIEALDLARNRVLVYQV-----
limpet   LRQKADEYRKRQV-GSHFSRAHLAQLLARQTELWDCECTCTTEA-----STISALSLETGSSPAGLA-----
oyster   LRRKAQYKRW-KRAW-GTHFSREHLVQLIAQQNQAWNDLSTARS-----STLSALSLESGASAKLRA-----
aplysia  LRRRAQYRKRQV-GTHFSREHLVQLMAKQNECWDLHSDGSSV-----RALNLETSGAHLRKG-----
Clustal Consensus : . : .

```

```

      910      920      930      940      950      960      970      980      990     1000
daphnia  -----KVDMTSAIN-----SKRGSPAKTAPQPNQARPQGHAPLV-----PT
silkworm -----KKFRS-----FRSAPHQSIHAKLQETK-----ALERSPHKTSPQKQKQLQGHSFDE-----GA
butterfly -----KKFRS-----FRSAPHQSIHAKLQETK-----ALERSPHKTSPQKQKQLQGHSFDE-----GA
bee      DSKADTERAIAARAKDFLIRHHLDRITGVGDGALLPSPTRKLEPVIARRREETKEHREEIQPKTKSSPKNSPRTGRSQSLGPTVTERRSPKRQPPRAPS
fly      RFSNIRHHLERTTGPVVEEGALLPSPTRKLEMPAITKRESESQRGSPPKKTALSRRHGSPQKQKSPQKGSPPKVLKTRSQSAGPGVAENESPKRQIRS---AS
masoni   -----IFNPDEAVLPA-----IQ
viverrini -----ELCSENEECEAHSTI-----SA
sinensis -----ELCSEETEEREAHSTI-----SA
anemone  -----QPVS DHMIRKAE-----TGNQEKRNESFGKNNNNEHGIHLVPTDDRASIDQSGH
Trichoplax -----RENRTTNERGYSYTTSSKKVSQVQQLP-----PS
urchin   -----PKEGARPSASAPDLGHE-----PT

```

|                   |                                                                 |
|-------------------|-----------------------------------------------------------------|
| Saccoglossus      | -----KEVAAQQQAKLA-----REEERRKLTSPSPSPSPHDSERTPQPA-----SV        |
| ciona             | -----DSCSVESIKGSD-----DDDCDVIRDENSVSCSSRQSLKGEL-----PV          |
| telata            | -----LETSKSSRRGGDDSDR-----PS                                    |
| Medaka            | -----CVDALDLASVSSLSRSAASELKTR-----TQ                            |
| tilapia           | -----GVEPLDLASHSS-----KRSSIAGSETQQMSKDTRIKKQAI PGP-----PA       |
| stickleback       | -----PAEALSPARSSRRSSVTSSTDRNTPT-----PP                          |
| molly             | -----CVEALDL-----ASMSSRRSSVSGGKTQRSAGRET PPGP-----GA            |
| platyfish         | -----CIEALDL-----ASMSSRRSSVSGGKTQRNAGRET PPGP-----GA            |
| mouse             | -----QKHPPTKL-----EERKVASGEQPLKNSTRRL EMP-EPAA-----LV           |
| human             | -----QKCPSTEP-----EEKGNIVEEQPQKNTTEKLGVS-APTI-----PV            |
| cat               | -----QKCPPTTL-----EEKKPALEEQPQKTTTEKLGVS DAPTL-----PV           |
| cattle            | -----QKCPSTQL-----EEKRTVLEEQPQKTTTEKLGVS NAPI-----PV            |
| python            | -----AQPEQFQPNNSGNLGVSDAATV-----PV                              |
| chick             | -----RPKMLQ-----QPGSREQSHQDDTEKKGLSDAPTV-----PV                 |
| xenopus           | -----NVHKSSIEENEDTGTLGISDVPTV-----PV                            |
| shark             | -----RPKQQRSHSESA-----VENAAPSONPPKFDDTGKNGISNVP TF-----PV       |
| gar               | -----SPVSPGSL-----SPVGNAKSRTEETEQAAGLHSRPTL-----PV              |
| zebrafish         | -----SPGHASV VVSRSSSGEVGLPEEPTL-----PV                          |
| tetra             | -----CSPG-----ASVSLSTRSSFEVGLSDGPTL-----PL                      |
| cavefish          | -----IVCHPQTYCKM-----QVLSLKHQHVNMRSSEFEVGLSDGPTL-----PL         |
| limpet            | -----ERPPQ-----RPPRLELNKLNLERKSRIQDRK LKKFSDLD-----ST           |
| oyster            | -----QKIELSEKPLLK-----IENIDTNNETLDNELCKGVRKSN DKMQQLKA-D-----PV |
| aplysia           | -----EKNLAQTAPADLVDALSHEATEGDS-----PL                           |
| Clustal Consensus |                                                                 |

1010 1020 1030 1040 1050 1060 1070 1080 1090 1100

|              |                                                                                                  |
|--------------|--------------------------------------------------------------------------------------------------|
| daphnia      | S-----RNKDN-----NIRNKGSDSTERARRDMSQHRSSISEGSKSRSKSAKPAKSPAQPTS GTGTGNVTLAIRPSLVS RPPARSASLGPERRM |
| silkworm     | ALDGV-KTGEN-----SAFKSPRRR-----                                                                   |
| butterfly    | VQDGA-KSEGS-----FRSPRRRPRS-----ADPAPAPPR-----                                                    |
| bee          | VTKDA-KEKEK-----ESKEKE-----KEQREKGG E-----                                                       |
| fly          | QAPSS-RKKTPTTGSGSERKARPSTLSTTFQSRI-----KSSSLPPPN-----                                            |
| mansoni      | RRRAM-LGSHN-----VAEIMDQDD-----                                                                   |
| viverrini    | RRRAM-MDSHH-----VAELLHEYQ-----                                                                   |
| sinensis     | RRRAM-MDSHH-----VAELLDEHQ-----                                                                   |
| anemone      | RKREA-WAEPG-----PIYPRAAIPPYG-----VSESLPTSR-----                                                  |
| Trichoplax   | QPKEA-WTVEA-----NENETEESN-----                                                                   |
| urchin       | RRKLA-WHANN-----NKAEEEPNP-----                                                                   |
| Saccoglossus | KRKLA-WPVDE-----KPRQEEVSS-----                                                                   |
| ciona        | ARKLA-WGESD-----SQSNDVD AV-----                                                                  |
| telata       | VVAEA-WKEKD-----SKASNSTAR-----                                                                   |
| Medaka       | RRTHAETHHTA-----EEEQRPDG-----                                                                    |
| tilapia      | ERRTA-WGEEE-----KEDEEEEEK-----REEEETTDE-----                                                     |
| stickleback  | GQAA-RGGGG-----EYERSEE-----                                                                      |
| molly        | ERHSA-WAEEE-----EETEEEE-----                                                                     |
| platyfish    | ERHAA-WAEEE-----EETEEEE-----                                                                     |
| mouse        | RRKLA-WDAEE-----STKEDTQEEPRA-----EEDGREERG-----                                                  |
| human        | RRRLA-WDTEN-----TSEDVQKQ PGE-----KEEEDDNEE-----                                                  |
| cat          | RRRLA-WDAEN-----TDEGVQKQPRE-----EEEEETEKD-----                                                   |
| cattle       | RRRLA-WDAED-----TT-EDVQKQPSG-----E-EEKEEEEEKE-----EGDK-----Q-----                                |
| python       | KRRLV-WDESG-----NDEQQENQSPAL-----GECKEEEKK-----                                                  |











|                   |                                                                                                       |            |
|-------------------|-------------------------------------------------------------------------------------------------------|------------|
| daphnia           | LTSSRSL-----                                                                                          | A-SDVLEKA  |
| silkworm          | -TNTATA-----                                                                                          |            |
| butterfly         | TPTGGLT-----                                                                                          | A-SEVLDRA  |
| bee               | VAGTSLRCLIEDPSFEYERKKEGSPVTTAAMTAPSSSTTPQGGYRILEAESPOGGAIDSGGAGSVGGIGSSGGGYHVLEAPTIVVPGSAQRSAASEVLEKA |            |
| fly               | PPPPPQS-----                                                                                          | APPQLTEQA  |
| mansoni           | MESSARL-----                                                                                          | A-HETTLERA |
| viverrini         | TLPSGDY-----                                                                                          | L-CHPYAEN  |
| sinensis          | IHPSGDY-----                                                                                          | L-CHPYAES  |
| anemone           | MKKRKDL-----                                                                                          | A-TKTLQRA  |
| Trichoplax        | -SMASSY-----                                                                                          | A-SDVLERS  |
| urchin            | GGGGGET-----                                                                                          | AMSSPYQPC  |
| Saccoglossus      | VSSSCSL-----                                                                                          | A-SEVLERA  |
| ciona             | ---NAS-----                                                                                           | A-AKLLERS  |
| telata            | VASSCSV-----                                                                                          | A-SEIFERA  |
| Medaka            | -SAP-----                                                                                             |            |
| tilapia           | -AASCST-----                                                                                          | A-SAVLERA  |
| stickleback       | -AASCSA-----                                                                                          | A-SVLERA   |
| molly             | -PVLCLH-----                                                                                          | L-SFH---   |
| platyfish         | -AASCSA-----                                                                                          | A-SAVLERA  |
| mouse             | -AVSSLR-----                                                                                          | A-FQTLARA  |
| human             | -AASSLR-----                                                                                          | A-FQTLARA  |
| cat               | -AASSLQ-----                                                                                          | A-FQTLARA  |
| cattle            | -AASSLQ-----                                                                                          | A-FQTLARA  |
| python            | -AVGSF-----                                                                                           | A-SQVLERA  |
| chick             | -AASSSL-----                                                                                          | A-SQILERA  |
| xenopus           | -AATGSL-----                                                                                          | A-SQVLERA  |
| shark             | -AASSTL-----                                                                                          | A-SQVLERA  |
| gar               | -AASSSL-----                                                                                          | A-SEILERA  |
| zebrafish         | -AASCMS-----                                                                                          | A-SEVLCRA  |
| tetra             | -AASCMS-----                                                                                          | A-SEVLDRA  |
| cavefish          | -AASCMS-----                                                                                          | A-SEVLDRA  |
| limpet            | IASSCSY-----                                                                                          | A-SEILERS  |
| oyster            | IASSCSL-----                                                                                          | A-SEVYERA  |
| aplysia           | VASSGSL-----                                                                                          | A-SEVLERA  |
| Clustal Consensus |                                                                                                       |            |

|              |                                    |       |                            |
|--------------|------------------------------------|-------|----------------------------|
|              | 1710                               | 1720  | 1730                       |
|              | .... .... .... .... .... .... .... |       |                            |
| daphnia      | RTRFD                              | RFTK  | KESDK                      |
| silkworm     | -----                              | ----- | -----                      |
| butterfly    | RTRFD                              | KFKK  | EDDV                       |
| bee          | RNRFD                              | KFKG  | SGSEN                      |
| fly          | KMDG                               | KPLST | LQ                         |
| mansoni      | QKQ                                | HERIL | REQKQYNENIYSPNAYSECECKRIEI |
| viverrini    | HEYRS                              | --WD  | YI                         |
| sinensis     | QEYRS                              | --WN  | YI                         |
| anemone      | RNRG                               | ARF   |                            |
| Trichoplax   | KQR                                | KENFW | GRK                        |
| urchin       | PMH                                | PA    | AV                         |
| Saccoglossus | RRRR                               | DEFW  | KQPSVQTK                   |
| ciona        | MQR                                | -QD   | FWANK                      |

|                   |                                    |
|-------------------|------------------------------------|
| telata            | KKRRDLFWAPNGENSDVSHRHRIMLLVGTSTHGS |
| Medaka            | -----                              |
| tilapia           | QKRREDFWCKR-----                   |
| stickleback       | QKRREHFWCKR-----                   |
| molly             | -----                              |
| platyfish         | QKRREDFWCKR-----                   |
| mouse             | QKRKENFWGKP-----                   |
| human             | KKRKENFWGKT-----                   |
| cat               | QKRKENFWGKT-----                   |
| cattle            | QKRKENFWGKT-----                   |
| python            | QRRKENFWGKM-----                   |
| chick             | QKRKEDFWGKT-----                   |
| xenopus           | QRRKEDFWGKK-----                   |
| shark             | QMRRDSFWGKNPRNEQ-----              |
| gar               | QRRKENFWGKS-----                   |
| zebrafish         | QRRKQEFWGKS-----                   |
| tetra             | QRRKEDFWGKT-----                   |
| cavefish          | QRRKEDFWGKT-----                   |
| limpet            | KDRRDNEWNNNTRVPTK-----             |
| oyster            | QKRTQEFWCKDG-IASR-----             |
| aplysia           | RKR-QEFWNKKDS-----                 |
| Clustal Consensus | -----                              |
